# Supplementary material
Source: Springer Nature journal article supplement (https://www.springermedizin.de/resource/supplementary/12960_2012_286_MOESM6_ESM.pdf/9569766)

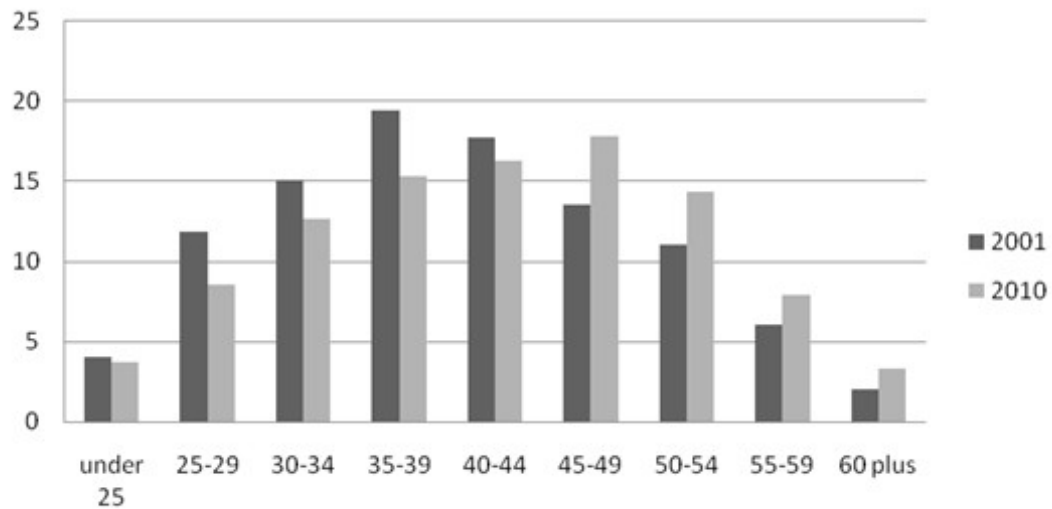

Supplement: MOESM6 [file 9569766]
